# Supplementary material for: Dendritic Cells and Cancer Immunotherapy: The Adjuvant Effect
Source: MDPI journal article supplement (doi:10.3390/ijms222212339), 2021-11-15
Supplement: s1 [file s1]

**Table S1.** Adjuvant Dendritic Cell Immunotherapy in combination with the standard of care for cancer treatment.

| Description                                                                                                                                                                                                | Drug(s)                                                                                           | Disease(s)                                                   | Status                 | Phase |
|------------------------------------------------------------------------------------------------------------------------------------------------------------------------------------------------------------|---------------------------------------------------------------------------------------------------|--------------------------------------------------------------|------------------------|-------|
| Adjuvant Dendritic Cell Immunotherapy for Pediatric Patients With High-grade Glioma or Diffuse Intrinsic Pontine Glioma                                                                                    | Dendritic cell vaccination + temozolomide-based chemoradiation+- conventional next-line treatment | High Grade Glioma Diffuse Intrinsic Pontine Glioma           | Not yet recruiting     | 1, 2  |
| Adjuvant Dendritic Cell-immunotherapy Plus Temozolomide in Glioblastoma Patients                                                                                                                           | Dendritic cell vaccine plus temozolomide chemotherapy                                             | Glioblastoma Multiforme of Brain                             | Recruiting             | 1, 2  |
| Evaluation of the Effects of Local Granulocyte-Macrophage Colony-Stimulating Factor (GM-CSF) in Adjuvant Administration on Dendritic Cells in Skin of Melanoma Patients and in Sentinel Lymph Nodes: MEL38 | GM-CSF-in-adjuvant, Montanide ISA-51                                                              | Melanoma                                                     | Completed              | nd    |
| Dendritic Cell-Based Tumor Vaccine Adjuvant Immunotherapy of Human Glioblastoma Multiforme (WHO Grade IV Gliomas)                                                                                          | Dendritic cells vaccine                                                                           | Glioblastoma Multiforme                                      | Unknown †              | 2     |
| Comparison of Dendritic Cells Versus Montanide as Adjuvants in a Melanoma Vaccine                                                                                                                          | KLH; Peptides; Dendritic Cells                                                                    | Melanoma                                                     | Completed              | 1     |
| A Phase II Study on Adjuvant Vaccination With Dendritic Cells Loaded With Autologous Tumor Homogenate in Resected Stage IV Rare Cancers.                                                                   | Autologous DC vaccine Interleukin-2                                                               | Head Neck Tumors, Neuroendocrine Tumors, Soft Tissue Sarcoma | Recruiting             | 2     |
| External Beam Radiation With Intratumoral Injection of Dendritic Cells As Neo-Adjuvant Treatment for Sarcoma                                                                                               | Dendritic Cell (DC) Injections, Radiation therapy, Complete Resection - Surgery for tumor removal | Soft Tissue Sarcoma                                          | Completed              | 2     |
| Neoantigen Dendritic Cell Vaccine and Nivolumab in HCC and Liver Metastases From CRC                                                                                                                       | Neoantigen Dendritic Cell Vaccine, Nivolumab                                                      | Hepatocellular Carcinoma, Colorectal Cancer                  | Recruiting             | 2     |
| Complementary Vaccination With Dendritic Cells Pulsed With Autologous Tumor Lysate in Resected Stage III and IV Melanoma Patients.                                                                         | Autologous Dendritic Cell vaccine Adjuvant Drug Therapy                                           | Malignant Melanoma                                           | Terminated             | 2     |
| ADCTA for Adjuvant Immunotherapy in Standard Treatment of Recurrent Glioblastoma Multiforme (GBM)                                                                                                          | Autologous Dendritic Cell/Tumor Antigen, ADCTA                                                    | Glioblastoma Multiforme                                      | Recruiting             | 3     |
| HER-2 Pulsed DC Vaccine to Prevent Recurrence of Invasive Breast Cancer                                                                                                                                    | HER-2 pulsed Dendritic Cell Vaccine                                                               | Breast Cancer                                                | Active, not recruiting | 1     |
| Dendritic Cell Immunotherapy Against Cancer Stem Cells in                                                                                                                                                  | Dendritic cell immunization, Adjuvant temozolomide                                                | Glioblastoma                                                 | Recruiting             | 2, 3  |

|                                                                                                                                               |                                                                                                                |                                                                                  |                        |   |  |
|-----------------------------------------------------------------------------------------------------------------------------------------------|----------------------------------------------------------------------------------------------------------------|----------------------------------------------------------------------------------|------------------------|---|--|
| Glioblastoma Patients Receiving Standard Therapy                                                                                              |                                                                                                                |                                                                                  |                        |   |  |
| Th-1 Dendritic Cell Immunotherapy Plus Standard Chemotherapy for Pancreatic Adenocarcinoma                                                    | Autologous DC vaccine                                                                                          | Pancreatic Adenocarcinoma                                                        | Recruiting             | 1 |  |
| Safety & Efficacy of DC Vaccine and TMZ for the Treatment of Newly-diagnosed Glioblastoma After Surgery                                       | Autologous dendritic cells pulsed with multiple neoantigen peptides, Temozolomide adjuvant chemotherapy        | Glioblastoma Multiforme of Brain                                                 | Not yet recruiting     | 1 |  |
| Dendritic Cell Vaccine for Patients With Brain Tumors                                                                                         | Autologous tumor lysate-pulsed DC vaccination, resiquimod, adjuvant polyICLC                                   | Glioma, Glioblastoma, Anaplastic Astrocytoma, Anaplastic Astro-oligodendroglioma | Active, not recruiting | 2 |  |
| Personalized Vaccine With SOC Chemo Followed by Nivo in Pancreatic Cancer                                                                     | Autologous Dendritic Cell Vaccine Loaded with Personalized Peptides (PEP-DC vaccine)                           | Pancreatic Adenocarcinoma                                                        | Recruiting             | 1 |  |
| Melanoma Patients Immunized With Natural Dendritic Cells                                                                                      | nDC vaccination                                                                                                | Melanoma (Skin)                                                                  | Active, not recruiting | 3 |  |
| Dendritic Cell Based Therapy for Breast Cancer Patients                                                                                       | DC vaccine, aromatase inhibitor                                                                                | Breast Cancer                                                                    | Withdrawn              | 2 |  |
| A Comparison of Matured Dendritic Cells and Montanide® in Study Subjects With High Risk of Melanoma Recurrence                                | DC Vaccine, Montanide Vaccine, Poly-ICLC                                                                       | Melanoma                                                                         | Active, not recruiting | 2 |  |
| Efficiency of Vaccination With Lysate-loaded Dendritic Cells in Patients With Newly Diagnosed Glioblastoma                                    | Autologous, tumor lysate-loaded, mature dendritic cells (DC), standard therapy                                 | Glioblastoma                                                                     | Recruiting             | 2 |  |
| Dendritic Cell Vaccination With Standard Postoperative Chemoradiation for the Treatment of Adult Glioblastoma: Phase I Clinical Trial         | TH-1 Dendritic Cell Immunotherapy                                                                              | Glioblastoma                                                                     | Not yet recruiting     | 1 |  |
| Vaccine Therapy in Treating Patients With Stage III Non-Small Cell Lung Cancer                                                                | Mutant p53 peptide pulsed dendritic cell vaccine, adjuvant therapy                                             | Lung Cancer                                                                      | Completed              | 2 |  |
| Decitabine Followed by a Cancer Antigen Vaccine for Patients With Neuroblastoma and Sarcoma                                                   | Autologous dendritic cell vaccine with adjuvant                                                                | Neuroblastoma, Ewings Sarcoma, Osteogenic Sarcoma                                | Completed              | 1 |  |
| RENEW: Feasibility of CMV RNA-Pulsed Dendritic Cells Vaccines for the Treatment of Newly Diagnosed Glioblastoma Patients.                     | Autologous DCs derived from PBMC loaded with RNA encoding the human CMV matrix protein pp65-flLAMP plus GM-CSF | Glioblastoma                                                                     | Not yet recruiting     | 1 |  |
| Vaccination With Autologous Dendritic Cells Loaded With Autologous Tumour Homogenate After Curative Resection for Stage IV Colorectal Cancer. | Autologous dendritic cells loaded with autologous tumour homogenate, IL2, Curative Resection                   | Stage IV Colorectal Cancer                                                       | Recruiting             | 2 |  |

|                                                                                                                                                                             |                                                                                                                                                                           |                                                                                      |                        |      |
|-----------------------------------------------------------------------------------------------------------------------------------------------------------------------------|---------------------------------------------------------------------------------------------------------------------------------------------------------------------------|--------------------------------------------------------------------------------------|------------------------|------|
| Vaccine Therapy With Either Neoadjuvant or Adjuvant Chemotherapy and Adjuvant Radiation Therapy in Treating Women With p53-Overexpressing Stage III Breast Cancer           | Autologous dendritic cell-adenovirus p53 vaccine                                                                                                                          | Breast Cancer                                                                        | Completed              | 1, 2 |
| Dendritic Cells Plus Autologous Tumor RNA in Uveal Melanoma                                                                                                                 | Autologous Dendritic Cells loaded with autologous Tumor RNA                                                                                                               | Uveal Melanoma                                                                       | Recruiting             | 3    |
| Cytomegalovirus (CMV) RNA-Pulsed Dendritic Cells for Pediatric Patients and Young Adults With WHO Grade IV Glioma, Recurrent Malignant Glioma, or Recurrent Medulloblastoma | CMV-DCs with GM-CSF, Td (tetanus toxoid)                                                                                                                                  | Glioblastoma, Medulloblastoma Recurrent                                              | Completed              | 1    |
| Phase II Feasibility Study of Dendritic Cell Vaccination for Newly Diagnosed Glioblastoma Multiforme                                                                        | Autologous Dendritic Cell, Temozolomide, Radiotherapy                                                                                                                     | Glioblastoma Multiforme                                                              | Completed              | 2    |
| Study With Dendritic Cell Immunotherapy in Resected Hepatic Metastasis of Colorectal Carcinoma                                                                              | Dendritic cells vaccine                                                                                                                                                   | Colorectal Carcinoma, Hepatic Metastasis                                             | Unknown †              | 2    |
| Vaccination With Autologous Dendritic Cells Loaded With Autologous Tumour Homogenate in Glioblastoma                                                                        | Autologous Dendritic Cells (DC) vaccine, Temozolomide                                                                                                                     | Glioblastoma                                                                         | Not yet recruiting     | 2    |
| Melanoma Vaccine in Treating Patients With Stage III Melanoma After Surgery to Remove Lymph Nodes                                                                           | HLA-A1-binding MAGE-1/MAGE-3 multipeptide-pulsed autologous dendritic cell vaccine, HLA-A2-binding TYR/MART-1/gp100 multipeptide-pulsed autologous dendritic cell vaccine | Melanoma (Skin)                                                                      | Unknown †              | 1, 2 |
| DC Vaccination in CML                                                                                                                                                       | DC vaccine                                                                                                                                                                | Myeloid Leukemia, Chronic                                                            | Recruiting             | 1, 2 |
| Messenger Ribonucleic Acid (mRNA) Transfected Dendritic Cell Vaccination in High Risk Uveal Melanoma Patients                                                               | Autologous dendritic cells electroporated with mRNA                                                                                                                       | Uveal Melanoma                                                                       | Terminated             | 1, 2 |
| Vaccine Therapy in Treating Patients With Head and Neck Cancer                                                                                                              | Mutant p53 peptide pulsed dendritic cell vaccine, tetanus toxoid helper peptide, adjuvant therapy                                                                         | Head and Neck Cancer                                                                 | Completed              | 1    |
| DC Migration Study for Newly-Diagnosed GBM                                                                                                                                  | Human CMV pp65-LAMP mRNA-pulsed autologous DCs, Unpulsed DCs, tetanus toxoid                                                                                              | Glioblastoma, Astrocytoma, Grade IV Giant Cell Glioblastoma, Glioblastoma Multiforme | Active, not recruiting | 2    |
| Vaccine Therapy in Treating Young Patients Who Are Undergoing Surgery for Malignant Glioma                                                                                  | Therapeutic autologous dendritic cells                                                                                                                                    | Brain and Central Nervous System Tumors                                              | Completed              | 1    |
| Dendritic Cell Based Therapy of Renal Cell Carcinoma                                                                                                                        | Tumor antigen loaded autologous dendritic cells                                                                                                                           | Advanced Renal Cell Carcinoma                                                        | Completed              | 1, 2 |

|                                                                                                                           |                                                                                                                  |                                                                    |                        |      |
|---------------------------------------------------------------------------------------------------------------------------|------------------------------------------------------------------------------------------------------------------|--------------------------------------------------------------------|------------------------|------|
| Dendritic Cell Based Therapy of Malignant Melanoma                                                                        | Tumor antigen loaded autologous dendritic cells                                                                  | Advanced Melanoma                                                  | Completed              | 1, 2 |
| Vaccine Therapy and GM-CSF in Treating Patients With Recurrent or Metastatic Melanoma                                     | Autologous tumor cell vaccine, therapeutic autologous dendritic cells, sargramostim                              | Melanoma (Skin)                                                    | Completed              | 2    |
| Dendritic Cell Based Therapy of Metastatic Breast Cancer                                                                  | Onco-peptide loaded autologous dendritic cells                                                                   | Metastatic Breast Cancer                                           | Terminated             | 1, 2 |
| Immunogenicity and Safety of DCs in Breast Cancer                                                                         | Dendritic cells                                                                                                  | Breast Cancer Female                                               | Completed              | 1, 2 |
| Dendritic Cell-based Immunotherapy in Mesothelioma                                                                        | Tumor lysate-loaded autologous dendritic cells                                                                   | Malignant Pleural Mesothelioma                                     | Completed              | 1    |
| Dendritic Cell/Myeloma Fusion Vaccine for Multiple Myeloma (BMT CTN 1401)                                                 | Melphalan                                                                                                        | Multiple Myeloma                                                   | Active, not recruiting | 2    |
| Carcinoembryonic Antigen-loaded Dendritic Cells in Advanced Colorectal Cancer Patients                                    | CEA-loaded dendritic cell vaccine                                                                                | Colorectal Cancer, Liver Metastases                                | Completed              | 1, 2 |
| Efficacy of Dendritic Cell Therapy for Myeloid Leukemia and Myeloma                                                       | Biological: dendritic cell vaccination (active specific immunotherapy)                                           | Acute Myeloid Leukemia, Chronic Myeloid Leukemia, Multiple Myeloma | Unknown †              | 2    |
| Dendritic Cell-based Immunotherapy Combined With Low-dose Cyclophosphamide in Patients With Malignant Mesothelioma        | DC + CTX                                                                                                         | Malignant (Pleural) Mesothelioma                                   | Completed              | 1    |
| Dendritic Cells in Lung Cancer                                                                                            | Biological: Allogeneic Tumour Lysate (MelCancerVac)                                                              | Non Small Cell Lung Cancer                                         | Completed              | 2    |
| Cellular Immunotherapy for Patients With High Risk Myelodysplastic Syndromes and Acute Myeloid Leukemia                   | Autologous dendritic cells electroporated with WT1 mRNA                                                          | Myelodysplastic Syndromes, Acute Myeloid Leukemia                  | Active, not recruiting | 1, 2 |
| Immunotherapy Targeted Against Cytomegalovirus in Patients With Newly-Diagnosed WHO Grade IV Unmethylated Glioma          | Human CMV pp65-LAMP mRNA-pulsed autologous DCs containing GM CSF, Temozolomide, Tetanus-Diphtheria Toxoid (Td)   | Glioblastoma                                                       | Recruiting             | 2    |
| Interferon-gamma or Aldesleukin and Vaccine Therapy in Treating Patients With Multiple Myeloma                            | Biological: idiotype-pulsed autologous dendritic cell vaccine APC8020, aldesleukin, recombinant interferon gamma | Multiple Myeloma and Plasma Cell Neoplasm                          | Completed              | 2    |
| Vaccination of Melanoma Patients With Dendritic Cells Loaded With Allogeneic Apoptotic-Necrotic Melanoma Cells            | DC/Apo-Nec                                                                                                       | Melanoma                                                           | Completed              | 1    |
| DC Migration Study to Evaluate TReg Depletion In GBM Patients With and Without Varlilumab                                 | Human CMV pp65-LAMP mRNA-pulsed autologous DCs, Temozolomide, Varlilumab                                         | Glioblastoma                                                       | Recruiting             | 2    |
| Autologous Dendritic Cells Loaded With Autologous Tumor Associated Antigens for Treatment of Newly Diagnosed Glioblastoma | AV-GBM-1                                                                                                         | Newly Diagnosed Glioblastoma                                       | Active, not recruiting | 2    |

|                                                                                                                                                                                                                      |                                                                          |                                                                                                                 |                        |         |
|----------------------------------------------------------------------------------------------------------------------------------------------------------------------------------------------------------------------|--------------------------------------------------------------------------|-----------------------------------------------------------------------------------------------------------------|------------------------|---------|
| Autologous Dendritic Cells Loaded With Autologous Tumor Associated Antigens for Treatment of Advanced Epithelial Ovarian Carcinomas                                                                                  | AVOVA-1                                                                  | Stage III Ovarian Carcinoma, Stage IV Ovarian Carcinoma, Fallopian Tube Carcinoma, Primary Peritoneal Carcinoma | Active, not recruiting | 2       |
| Administration of Autologous Dendritic Cells (DCs) Infected With an Adenovirus Expressing Her-2                                                                                                                      | CD34+ derived DCs                                                        | Breast Neoplasms                                                                                                | Completed              | 1       |
| Dendritic Cell Cancer Vaccine for High-grade Glioma                                                                                                                                                                  | Trivax, Temozolomide, Surgery, Radiotherapy                              | Glioblastoma Multiforme                                                                                         | Completed              | 2       |
| Phase IIB TL + YCWP + DC in Melanoma                                                                                                                                                                                 | TLPLDC                                                                   | Melanoma                                                                                                        | Active, not recruiting | 2       |
| myDC/pDC in Stage III Melanoma Patients                                                                                                                                                                              | myDC vaccination, pDC vaccination, combined myDC/pDC vaccination         | Melanoma                                                                                                        | Active, not recruiting | 1, 2    |
| Personalized DC Vaccine for Postoperative Cancer                                                                                                                                                                     | DC vaccine subcutaneous administration                                   | Gastric Cancer, Hepatocellular Carcinoma, Non-Small-Cell Lung Cancer, Colon Rectal Cancer                       | Recruiting             | 1       |
| Immunotherapy Combined With Capecitabine Versus Capecitabine Monotherapy in Advanced Breast Cancer                                                                                                                   | DC-CIK Immunotherapy, Capecitabine Monotherapy                           | Breast Cancer                                                                                                   | Active, not recruiting | 2       |
| Dendritic Cell Vaccination in Patients With Lynch Syndrome or Colorectal Cancer With MSI                                                                                                                             | DC vaccination                                                           | Colorectal Cancer                                                                                               | Active, not recruiting | 1 2     |
| Dendritic Cell Vaccine and Chemotherapy for Patients With Pancreatic Cancer                                                                                                                                          | DC Vaccine + Standard of Care Chemotherapy                               | Pancreatic Cancer                                                                                               | Terminated             | 1       |
| Paclitaxel, Cyclophosphamide, and Doxorubicin Followed by Autologous Dendritic Cells and Surgery With or Without Radiation Therapy and/or Hormone Therapy in Treating Women With Stage II or Stage III Breast Cancer | Therapeutic autologous dendritic cells, aromatase inhibition therapy     | Breast Cancer                                                                                                   | Completed              | 2       |
| HER2 Directed Dendritic Cell Vaccine During Neoadjuvant Therapy of HER2+Breast Cancer                                                                                                                                | Dendritic Cell Vaccine (DC1), Neoadjuvant Chemotherapy, Curative Surgery | Breast Cancer                                                                                                   | Recruiting             | Early 1 |
| Basiliximab in Treating Patients With Newly Diagnosed Glioblastoma Multiforme Undergoing Targeted Immunotherapy and Temozolomide-Caused Lymphopenia                                                                  | RNA-loaded dendritic cell vaccine, basiliximab                           | Malignant Neoplasms Brain                                                                                       | Completed              | 1       |

|                                                                                                                                                            |                                                                                         |                                                                                                                               |                        |      |
|------------------------------------------------------------------------------------------------------------------------------------------------------------|-----------------------------------------------------------------------------------------|-------------------------------------------------------------------------------------------------------------------------------|------------------------|------|
| aDC1 Vaccine + Chemokine Modulatory Regimen (CKM) as Adjuvant Treatment of Peritoneal Surface Malignancies                                                 | DC vaccine, Celecoxib, Interferon Alfa-2b, rintatolimod                                 | Malignant Neoplasm of Pancreas Metastatic to Peritoneal Surface, Malignant Peritoneal Mesothelioma, Peritoneal Carcinomatosis | Completed              | 1, 2 |
| Wilm's Tumor 1 Protein Vaccine to Treat Cancers of the Blood                                                                                               | WT1 Peptide-Pulsed Dendritic Cells, Donor Lymphocytes, IL-4                             | Leukemia: Acute Myelogenous (AML), Acute Lymphocytic (ALL), , Chronic Myelogenous (CML)                                       | Completed              | 1, 2 |
| Personalized Vaccine for Cancer Immunotherapy                                                                                                              | Peptide pulsed Dendritic cell                                                           | Breast Cancer Female                                                                                                          | Completed              | 1    |
| Vaccine Therapy in Treating Patients With Metastatic Melanoma                                                                                              | Therapeutic autologous dendritic cells, filgrastim                                      | Melanoma (Skin)                                                                                                               | Unknown †              | 1    |
| Vaccine Therapy in Treating Patients Who Are Undergoing Surgery for Stage IB, Stage II, or Stage IIIA Non-Small Cell Lung Cancer                           | Therapeutic autologous dendritic cells, autologous tumor cell vaccine, adjuvant therapy | Lung Cancer                                                                                                                   | Terminated             | 1    |
| Vaccination With Dendritic Cells Loaded With Brain Tumor Stem Cells for Progressive Malignant Brain Tumor                                                  | Dendritic Cells, Imiquimod                                                              | Brain Tumor, Glioblastoma, Medulloblastoma                                                                                    | Completed              | 1    |
| Dendritic Cell Vaccine With Imiquimod for Patients With Malignant Glioma                                                                                   | Biological: Dendritic Cell Vaccine in combination with Imiquimod cream                  | Malignant Glioma                                                                                                              | Completed              | 1    |
| Dendritic Cell (DC) Vaccine for Malignant Glioma and Glioblastoma                                                                                          | Dendritic Cell Vaccine, Tumor Lysate, Imiquimod                                         | Malignant Glioma, Glioblastoma Multiforme, Anaplastic Astrocytoma                                                             | Active, not recruiting | 1    |
| Dendritic Cell Vaccine Therapy With In Situ Maturation in Pediatric Brain Tumors                                                                           | Dendritic Cell Vaccine, Tumor Lysate, Imiquimod                                         | Glioma, Brain Cancer, Brain Tumor                                                                                             | Terminated             | 1    |
| Vaccination of Patients With Ovarian Cancer With Dendritic Cell/Tumor Fusions With Granulocyte Macrophage Colony-stimulating Factor (GM-CSF) and Imiquimod | Dendritic Cell/Tumor Fusion Vaccine, GM-CSF, imiquimod                                  | Ovarian Cancer, Primary Peritoneal Cancer, Fallopian Tube Cancer                                                              | Active, not recruiting | 2    |
| Vaccination of Patients With Breast Cancer With Dendritic Cell/Tumor Fusions and IL-12                                                                     | DC, Interleukin-12                                                                      | Breast Cancer                                                                                                                 | Terminated             | 1, 2 |

Adjuvant Dendritic Cell Immunotherapy in combination with Immune Checkpoint Inhibitors

| Description                                                                                                                                                                                                                                                 | Drug(s)                                                                    | Disease(s)                                                                                                                                       | Status                 | Phase |
|-------------------------------------------------------------------------------------------------------------------------------------------------------------------------------------------------------------------------------------------------------------|----------------------------------------------------------------------------|--------------------------------------------------------------------------------------------------------------------------------------------------|------------------------|-------|
| Multi-center Phase I/IIa Trial of an Autologous Tumor Lysate (TL) + Yeast Cell Wall Particles (YCWP) + Dendritic Cells (DC) Vaccine in Addition to Standard of Care Checkpoint Inhibitor of Choice in Metastatic Melanoma Patients With Measurable Disease. | TLPLDC Vaccine                                                             | Metastatic Melanoma                                                                                                                              | Completed              | 1, 2  |
| Safety of AV-MEL-1 With Anti-PD-1 Therapy in Metastatic Melanoma                                                                                                                                                                                            | Drug: AV-MEL-1                                                             | Metastatic Melanoma                                                                                                                              | Recruiting             | 1     |
| Dendritic Cell Vaccines Against Her2/Her3, Cytokine Modulation Regimen, and Pembrolizumab for the Treatment of Brain Metastasis From Triple Negative Breast Cancer or HER2+ Breast Cancer                                                                   | Anti-HER2/HER3 Dendritic Cell Vaccine<br>Celecoxib<br>Pembrolizumab        | Stage IV Breast Cancer,<br>Metastatic Malignant Brain Neoplasm,<br>Metastatic Triple-Negative Breast Carcinoma,<br>Stage IV Breast Cancer        | Not yet recruiting     | 2     |
| Phase I Clinical Trial of Cryoimmunotherapy Against Prostate Cancer                                                                                                                                                                                         | Dendritic cell based cryoimmunotherapy<br>Cyclophosphamide<br>ipilimumab   | Prostate Cancer                                                                                                                                  | Completed              | 1     |
| A Study to Evaluate the Safety and Effectiveness of ILIxadencel Administered Into Tumors in Combination With Checkpoint Inhibitor (CPI) in Patients With ADvanced Cancer                                                                                    | IlIxadencel<br>Pembrolizumab                                               | Carcinoma,<br>Squamous Cell of Head and Neck, Gastric Adenocarcinoma,<br>Gastroesophageal Junction Adenocarcinoma,<br>Non-small Cell Lung Cancer | Active, not recruiting | 1, 2  |
| Atezolizumab Plus Tivozanib in Immunologically Cold Tumor Types                                                                                                                                                                                             | Atezolizumab<br>Tivozanib                                                  | Bile Duct Cancer<br>Gall Bladder Cancer<br>Breast Cancer                                                                                         | Recruiting             | 1, 2  |
| Study of SQZ-PBMC-HPV in Patients With HPV16+ Recurrent, Locally Advanced or Metastatic Solid Tumors                                                                                                                                                        | SQZ-PBMC-HPV<br>Atezolizumab<br>Ipilimumab<br>Nivolumab                    | Adult Solid Tumor                                                                                                                                | Recruiting             | 1     |
| The Combination of Anti-PD-1 With Radiotherapy in Previously Untreated Metastatic Melanoma                                                                                                                                                                  | The combination of radiotherapy with anti-PD1 (pembrolizumab or nivolumab) | Melanoma                                                                                                                                         | Recruiting             | 2     |
| Trial of SBRT With Concurrent Ipilimumab in Metastatic Melanoma                                                                                                                                                                                             | Radiation: Stereotactic body radiotherapy<br>Ipilimumab                    | Melanoma                                                                                                                                         | Completed              | 1     |
| Trial to Evaluate Safety and Efficacy of Vinorelbine With Metronomic Administration in Combination                                                                                                                                                          | Atezolizumab<br>Vinorelbine                                                | Non-small Cell Lung Cancer                                                                                                                       | Active, not recruiting | 2     |



|                                                                                                                                           |                                                                                                                   |                                                                          |                        |   |                |
|-------------------------------------------------------------------------------------------------------------------------------------------|-------------------------------------------------------------------------------------------------------------------|--------------------------------------------------------------------------|------------------------|---|----------------|
| With Atezolizumab as Second-line Treatment for Patients With Stage IV Non-small Cell Lung Cancer                                          |                                                                                                                   |                                                                          |                        |   |                |
| Neoantigen Dendritic Cell Vaccine and Nivolumab in HCC and Liver Metastases From CRC                                                      | Neoantigen Dendritic Cell Vaccine<br>Nivolumab                                                                    | Hepatocellular Carcinoma<br>Colorectal Cancer                            | Recruiting             | 2 |                |
| Combination Immunotherapy- Ipilimumab-Nivolumab-Dendritic Cell p53 Vac - Patients With Small Cell Lung Cancer (SCLC)                      | Nivolumab<br>Ipilimumab<br>Dendritic Cell based p53 Vaccine                                                       | Small Cell Lung Cancer<br>Lung Cancer<br>Relapsed Small Cell Lung Cancer | Active, not recruiting | 2 |                |
| Autologous Dendritic Cells Pulsed With Tumor Lysate Antigen Vaccine and Nivolumab in Treating Patients With Recurrent Glioblastoma        | autologous dendritic cells pulsed with tumor lysate antigen Vaccine<br>Laboratory Biomarker Analysis<br>Nivolumab | Giant Cell Glioblastoma<br>Gliosarcoma<br>Oligodendroglioma              | Withdrawn              | 2 |                |
| Tislelizumab Combined With Anlotinib and 2-cycles Irinotecan as Second Line Treatment of SCLC                                             | Anlotinib Tislelizumab Irinotecan                                                                                 | Small Cell Lung Cancer (SCLC)                                            | Recruiting             |   | Not Applicable |
| Immunostimulating Interstitial Laser Thermotherapy in Malignant Melanoma                                                                  | Immunostimulating Interstitial Laser Thermotherapy                                                                | Melanoma<br>Malignant Melanoma                                           | Terminated             |   | Not Applicable |
| Immunostimulating Interstitial Laser Thermotherapy in Solid Cancers                                                                       | Immunostimulating Interstitial Laser Thermotherapy                                                                | Neoplasms                                                                | Terminated             |   | Not Applicable |
| Dendritic Cell (DC)/Myeloma Fusions in Combination With Nivolumab in Patients With Relapsed Multiple Myeloma                              | Nivolumab<br>DC/myeloma fusions/GM-CSF                                                                            | Multiple Myeloma                                                         | Terminated             | 2 |                |
| Clinical Trial of SBRT and Systemic Pembrolizumab With or Without Avelumab/Ipilimumab +Dendritic Cells in NSCLC                           | Avelumab<br>Ipilimumab 5 MG/ML<br>Pembrolizumab 100 MG in 4 ML Injection<br>CD1c (BDCA-1)+ / CD141 (BDCA-3)+ myDC | Non Small Cell Lung Cancer                                               | Recruiting             | 2 |                |
| Polarized Dendritic Cell (aDC1) Vaccine, Interferon Alpha-2, Rintatolimod, and Celecoxib for the Treatment of HLA-A2+ Refractory Melanoma | Alpha-type-1 Polarized Dendritic Cells<br>Celecoxib<br>PD-1 Ligand Inhibitor                                      | HLA-A2 Positive Cells Present<br>Refractory Melanoma                     | Not yet recruiting     | 2 |                |
| Intratumoral Injection of Autologous CD1c (BDCA-1)+ myDC, Avelumab, and Ipilimumab Plus Systemic Nivolumab                                | Intratumoral injection of autologous CD1c (BDCA-1)+ myDC                                                          | Solid Tumor Metastases to Soft Tissue                                    | Completed              | 1 |                |
| PANFIRE-3 Trial: Assessing Safety and Efficacy of Irreversible Electroporation (IRE) + Nivolumab + CpG for Metastatic Pancreatic Cancer   | Irreversible Electroporation (IRE)<br>Nivolumab<br>Toll-Like Receptor 9                                           | Pancreatic Cancer<br>Metastatic Pancreatic Cancer                        | Recruiting             | 1 |                |
| Dendritic Cell Immunotherapy Plus Standard Treatment of Advanced Renal Cell Carcinoma                                                     | CMN-001<br>Nivolumab+Ipilimumab<br>Lenvatinib+Everolimus                                                          | Advanced Renal Cell Carcinoma                                            | Recruiting             | 2 |                |



|                                                                                                                                                                                           |                                                                                                |                                                                                                                              |                        |      |
|-------------------------------------------------------------------------------------------------------------------------------------------------------------------------------------------|------------------------------------------------------------------------------------------------|------------------------------------------------------------------------------------------------------------------------------|------------------------|------|
| Combination Immunotherapy in Rare Cancers Under Investigation                                                                                                                             | Ipilimumab<br>Nivolumab                                                                        | Advanced Biliary Tract Cancer<br>Neuroendocrine Tumors<br>Female Reproductive System Neoplasm<br>MSI-H Solid Malignant Tumor | Recruiting             | 2    |
| A Phase II Trial of Ipilimumab and Nivolumab for the Treatment of Rare Cancers                                                                                                            | Ipilimumab<br>Nivolumab                                                                        | Gastrointestinal Cancer<br>Neuroendocrine Tumours<br>Malignant Female Reproductive System Neoplasm                           | Active, not recruiting | 2    |
| Nivolumab and Eribulin in HER2 Negative Metastatic Breast Cancer                                                                                                                          | Nivolumab                                                                                      | Metastatic Breast Cancer                                                                                                     | Active, not recruiting | 1, 2 |
| CP-675,206 (CTLA4-Blocking Monoclonal Antibody) Combined With Dendritic Cell Vaccine Therapy in Treating Patients With Stage III or Stage IV Melanoma That Cannot Be Removed With Surgery | maximum tolerated dose of anti-cytotoxic T-lymphocyte-associated antigen-4 monoclonal antibody | Melanoma (Skin)                                                                                                              | Completed              | 1    |
| Electroporation Potentiated Immunotherapy in Cancer                                                                                                                                       | Pembrolizumab<br>Irreversible electroporation                                                  | Pancreas Cancer, Metastatic                                                                                                  | Recruiting             | 2    |
| A Safety Study of the Pan-immunotherapy in Patients With Unresectable/Metastatic Solid Tumors or Lymphomas                                                                                | Manganese Chloride Anti-PD-1 antibody<br>Combination Product: Systemic therapy                 | Solid Tumor<br>Lymphoma                                                                                                      | Unknown <sup>+</sup>   | 1    |
| An Open-label, Phase I/II Study of the Pan-immunotherapy in Patients With Relapsed/Refractory Ovarian Cancer                                                                              | Manganese Chloride<br>nab-paclitaxel<br>Platinum chemotherapy<br>Sintilimab                    | Ovarian Cancer                                                                                                               | Recruiting             | 1, 2 |
| Gene-Modified T Cells, Vaccine Therapy, and Nivolumab in Treating Patients With Stage IV or Locally Advanced Solid Tumors Expressing NY-ESO-1                                             | Aldesleukin<br>Cyclophosphamide<br>Fludarabine Phosphate                                       | Adult and Child Solid Neoplasm<br>Metastatic Neoplasm                                                                        | Completed              | 1    |
| Immune Modulation Study in Patients With Metastatic Melanoma Treated With Anti-PD1 Monoclonal Antibodies                                                                                  | blood sampling<br>Nivolumab                                                                    | Metastatic Melanoma                                                                                                          | Unknown <sup>+</sup>   | 4    |
| Immunization Strategy With Intratumoral Injections of Pexa-Vec With Ipilimumab in Metastatic / Advanced Solid Tumors.                                                                     | Pexa-Vec<br>Ipilimumab                                                                         | Metastatic Tumor<br>Advanced Tumor                                                                                           | Recruiting             | 1    |
| Phase 1 Trial of Ipilimumab and GVAX in Patients With Metastatic Castration-resistant Prostate Cancer                                                                                     | GVAX and ipilimumab                                                                            | Prostate Cancer                                                                                                              | Terminated             | 1    |

|                                                                                                                                                              |                                                                                        |                                                                                             |                                    |      |
|--------------------------------------------------------------------------------------------------------------------------------------------------------------|----------------------------------------------------------------------------------------|---------------------------------------------------------------------------------------------|------------------------------------|------|
| Tremelimumab and CP-870,893 in Patients With Metastatic Melanoma                                                                                             | CD40 agonist monoclonal antibody CP-870,893 tremelimumab laboratory biomarker analysis | Recurrent Melanoma Stage IV Melanoma                                                        | Completed                          | 1    |
| A Phase I/II Study of the Pan-immunotherapy in Patients With Local Advanced/Metastatic BTC                                                                   | Manganese Chloride nab-paclitaxel Gemcitabine anti-PD-1 antibody                       | Biliary Tract Cancer (BTC)                                                                  | Unknown <sup>†</sup>               | 1, 2 |
| An Open-label, Phase I/II Study of the Pan-immunotherapy in Patients With Local Advanced/Metastatic Pancreatic Cancer                                        | Manganese Chloride nab-paclitaxel Gemcitabine anti-PD-1 antibody                       | Pancreatic Cancer                                                                           | Recruiting                         | 1, 2 |
| Nivolumab in Treating Patients With Relapsed or Refractory Peripheral T-cell Lymphoma                                                                        | Nivolumab                                                                              | Blastic Plasmacytoid Dendritic Cell Neoplasm Hepatosplenic T-Cell Lymphoma HTLV-1 Infection | Terminated Has Results             | 2    |
| Abatacept in early Onset Polymyalgia Rheumatica: Study ALORS                                                                                                 | Abatacept Placebos                                                                     | Polymyalgia Rheumatica                                                                      | Unknown <sup>†</sup>               | 3    |
| Ipilimumab and All-Trans Retinoic Acid Combination Treatment of Advanced Melanoma                                                                            | VESANOID Ipilimumab                                                                    | Melanoma                                                                                    | Active, not recruiting Has Results | 3    |
| Nivolumab, BMS-936558 in Combination With Relatlimab, BMS-986016 in Patients With Metastatic Melanoma Naïve to Prior Immunotherapy in the Metastatic Setting | Relatlimab Nivolumab Relatlimab + Nivolumab                                            | Melanoma                                                                                    | Recruiting                         | 3    |
| Effect on Ocrencia (Abatacept) on the Apoptosis of T Cells, B Cells and APC Cells in Rheumatoid Arthritis                                                    | Group 1 or Ocrencia treated group Group 2 (DMARDS treated group)                       | Apoptotic DNA Damage Rheumatoid Arthritis T-cell Lymphocytosis                              | Withdrawn                          | 4    |
| Single Agent and Combined Inhibition After Allogeneic Stem Cell Transplant                                                                                   | Nivolumab Ipilimumab                                                                   | Acute Myeloid Leukemia and Myelodysplastic Syndrome                                         | Active, not recruiting             | 1    |

Adjuvant Dendritic Cell Immunotherapy in combination with other Adoptive Cells Therapies for cancer treatment.

| Description                                                                          | Drug(s)                                                                              | Disease(s)                                     | Status     | Phase |
|--------------------------------------------------------------------------------------|--------------------------------------------------------------------------------------|------------------------------------------------|------------|-------|
| PEACH TRIAL- Precision Medicine and Adoptive Cellular Therapy                        | Tumor-specific ex vivo expanded autologous lymphocyte transfer (TTRNA- $\alpha$ ALT) | Neuroblastoma Diffuse Intrinsic Pontine Glioma | Recruiting | 1     |
| T Cell Transfer With or Without Dendritic Cell Vaccination in Patients With Melanoma | Cyclophosphamide Fludarabine T cells                                                 | Melanoma                                       | Recruiting | 1     |

|                                                                                                                                                              |                                                                                                                  |                                                                         |                        |      |
|--------------------------------------------------------------------------------------------------------------------------------------------------------------|------------------------------------------------------------------------------------------------------------------|-------------------------------------------------------------------------|------------------------|------|
| Adoptive Cellular Therapy in Pediatric Patients With High-grade Gliomas                                                                                      | TTRNA-DC vaccines with GM-CSF<br>Dose-intensified TMZ<br>Autologous Hematopoietic Stem cells (HSCs)              | Malignant Glioma<br>High Grade Glioma                                   | Recruiting             | 1    |
| Lymphodepletion Plus Adoptive Cell Transfer With or Without Dendritic Cell Immunization in Patients With Metastatic Melanoma                                 | Dendritic Cell Immunization<br>Cyclophosphamide<br>Fludarabine                                                   | Melanoma                                                                | Active, not recruiting | 2    |
| Gene-Modified T Cells, Vaccine Therapy, and Ipilimumab in Treating Patients With Locally Advanced or Metastatic Malignancies                                 | cyclophosphamide<br>fludarabine phosphate<br>NY-ESO-1 reactive TCR retroviral vector transduced autologous PBL   | Unspecified Adult Solid Tumor, Protocol Specific                        | Terminated             | 1    |
| Autologous SCT Followed by Dendritic Cell p53 Vaccination in Patients With Limited Stage Small Cell Lung Cancer                                              | Combined adenovirus vectored p53 transfected dendritic cell vaccine and ex vivo expanded T-lymphocytes           | Small Cell Lung Cancer                                                  | Terminated             | 2    |
| Gene-Modified T Cells, Vaccine Therapy, and Nivolumab in Treating Patients With Stage IV or Locally Advanced Solid Tumors Expressing NY-ESO-1                | Aldesleukin<br>Cyclophosphamide<br>Fludarabine Phosphate                                                         | Adult Solid Neoplasm<br>Childhood Solid Neoplasm<br>Metastatic Neoplasm | Completed              | 1    |
| Adoptive Cell Therapy Plus Chemotherapy and Radiation After Surgery in Treating Patients With Colorectal Cancer                                              | DC-CIK<br>Radiotherapy<br>Chemotherapy                                                                           | Colorectal Cancer<br>Neoplasms<br>Intestinal Neoplasms                  | Unknown <sup>+</sup>   | 2    |
| Study of Gene Modified Immune Cells in Patients With Advanced Melanoma                                                                                       | F5 TCR transgenic cells and MART-1 peptide pulsed dendritic cells<br>non-myeloablative conditioning chemotherapy | Metastatic Melanoma                                                     | Completed              | 2    |
| Flotetuzumab for Relapsed Acute Myeloid Leukemia (AML) and Myelodysplastic Syndrome (MDS) Following Allogeneic Hematopoietic Cell Transplantation (Allo-HCT) | MGD006<br>Donor lymphocyte infusion                                                                              | Relapsed Acute Myeloid Leukemia                                         | Recruiting             | 2    |
| Study of Chemotherapy With Adoptive Cellular Therapy With DC-CIK Cells in Triple Negative Breast Cancer Patients                                             | DC-CIK<br>Standard chemotherapy                                                                                  | Breast Neoplasms<br>Neoplasm<br>Metastasis                              | Completed              | nd   |
| Vaccine Immunotherapy for Recurrent Medulloblastoma and Primitive Neuroectodermal Tumor                                                                      | TTRNA-xALT<br>TTRNA-DCs                                                                                          | Medulloblastoma<br>Neuroectodermal Tumor                                | Active, not recruiting | 1, 2 |
| Brain Stem Gliomas Treated With Adoptive Cellular Therapy During Focal Radiotherapy Recovery Alone or With Dose-intensified Temozolomide (Phase I)           | TTRNA-DC vaccines with GM-CSF<br>TTRNA-xALT<br>Cyclophosphamide + Fludarabine<br>Lymphodepletive Conditioning    | Diffuse Intrinsic Pontine Glioma (DIPG)<br>Brain Stem Glioma            | Recruiting             | 1    |
| Immunotherapy Using Precision T Cells Specific to Personalized Neo-antigen for the Treatment of Advanced Malignant Tumor of Biliary Tract                    | Gemcitabine<br>Dendritic cell-precision T cell for neo-antigen combined with gemcitabine treatment               | Advanced Biliary Tract Malignant Tumor                                  | Unknown <sup>+</sup>   | 1, 2 |

|                                                                                                                                                                                     |                                                                                                                                                                |                                                                                                                         |                        |                |
|-------------------------------------------------------------------------------------------------------------------------------------------------------------------------------------|----------------------------------------------------------------------------------------------------------------------------------------------------------------|-------------------------------------------------------------------------------------------------------------------------|------------------------|----------------|
| Gene and Vaccine Therapy in Treating Patients With Advanced Malignancies                                                                                                            | aldesleukin<br>fludarabine phosphate<br>cyclophosphamide                                                                                                       | Malignant Neoplasm                                                                                                      | Active, not recruiting | 2              |
| Pilot Study of T-APCs Following CAR T Cell Immunotherapy for CD19+ Leukemia                                                                                                         | T-cell Antigen Presenting Cells expressing truncated CD19 (T-APC)                                                                                              | CD 19+ Acute Leukemia                                                                                                   | Recruiting             | 1              |
| Concurrent Chemoradiation With or Without DC-CIK Immunotherapy in Treating Locally Advanced Esophageal Cancer                                                                       | concurrent chemoradiotherapy plus DC-CIK immunotherapy<br>Concurrent chemoradiation only                                                                       | Esophageal Carcinoma                                                                                                    | Recruiting             | Not Applicable |
| Immunotherapy Using Pluripotent Killer-Programmed Cell Death 1 (PIK-PD-1) Cells for the Treatment of Advanced Hepatocellular Carcinoma                                              | PIK-PD-1 cells<br>DC-PMAT                                                                                                                                      | Advanced Hepatocellular Carcinoma                                                                                       | Unknown <sup>†</sup>   | 1, 2           |
| Evaluation of Recovery From Drug-Induced Lymphopenia Using Cytomegalovirus-specific T-cell Adoptive Transfer                                                                        | CMV-ALT + CMV-DCs<br>CMV-ALT + Saline                                                                                                                          | Glioblastoma                                                                                                            | Completed              | 1              |
| Immunotherapy Using Pluripotent Killer-Human Epidermal Growth Factor Receptor-2 (PIK-HER2) Cells for the Treatment of Advanced Gastric Cancer With Liver Metastasis                 | PIK-HER2<br>DC-PMAT                                                                                                                                            | Liver Metastasis<br>Gastric Cancer                                                                                      | Unknown <sup>†</sup>   | 1, 2           |
| Specialized Immune Cells (nCTLs) and a Vaccine (Alpha-type-1 Polarized Dendritic Cells) in Treating Patients With Stage II-IV Ovarian, Fallopian Tube, or Primary Peritoneal Cancer | Alpha-type-1 Polarized Dendritic Cells<br>Autologous Natural Killer Cell-like CTLs                                                                             | Stage II Fallopian Tube Cancer AJCC v8<br>Stage II Ovarian Cancer AJCC v8<br>Stage II Primary Peritoneal Cancer AJCC v8 | Not yet recruiting     | 1, 2           |
| Proteome-based Personalized Immunotherapy of Glioblastoma                                                                                                                           | Dendritic vaccine, allogeneic hematopoietic stem cells, cytotoxic lymphocytes<br>Dendritic vaccine, autologous hematopoietic stem cells, cytotoxic lymphocytes | Glioblastoma                                                                                                            | Unknown <sup>†</sup>   | 1, 2           |
| Proteome-based Immunotherapy of Brain Metastases From Breast Cancer                                                                                                                 | Dendritic vaccine, allogeneic hematopoietic stem cells, cytotoxic lymphocytes<br>Dendritic vaccine, autologous hematopoietic stem cells, cytotoxic lymphocytes | Neoplasm Metastasis                                                                                                     | Unknown <sup>†</sup>   | 2, 3           |
| Proteome-based Immunotherapy of Lung Cancer Brain Metastases                                                                                                                        | Dendritic vaccine, allogeneic hematopoietic stem cells, cytotoxic lymphocytes<br>Dendritic vaccine, autologous hematopoietic stem cells, cytotoxic lymphocytes | Neoplasm Metastasis                                                                                                     | Unknown <sup>†</sup>   | 2, 3           |
| HA-1 T TCR T Cell Immunotherapy for the Treatment of Patients With Relapsed or Refractory Acute Leukemia After Donor Stem Cell Transplant                                           | CD8+ and CD4+ Donor Memory T-cells-expressing HA1-Specific TCR<br>Fludarabine<br>Laboratory Biomarker Analysis                                                 | Juvenile Myelomonocytic Leukemia<br>Recurrent Acute Biphentotypic Leukemia                                              | Recruiting             | 1              |

|                                                                                                                                                                                                                                             |                                                                                                                                   |                                           |           |      |  |
|---------------------------------------------------------------------------------------------------------------------------------------------------------------------------------------------------------------------------------------------|-----------------------------------------------------------------------------------------------------------------------------------|-------------------------------------------|-----------|------|--|
|                                                                                                                                                                                                                                             |                                                                                                                                   | Recurrent Acute Undifferentiated Leukemia |           |      |  |
| The Adoptive Immunotherapy for Solid Tumors Using Modified Autologous Cytokine-induced Killer Cells                                                                                                                                         | cytokine induced killer cells                                                                                                     | Cholangiocarcinoma                        | Unknown † | 1, 2 |  |
| DC-CIK In Combination With Chemotherapy ( Gio / Oxaliplatin or Cisplatin ) Versus First-line Chemotherapy for Locally Advanced Unresectable or Metastatic Gastric Adenocarcinoma Randomized Controlled Phase II Clinical Study of Treatment | Autologous dendritic cells co-cultured with cytokine-induced killer cells, Gimeracil and Oteracil Porassium Capsules, Oxaliplatin | Gastric Cancer                            | Unknown † | 2    |  |
| Clinical Study of DC Plus CIK for Patients With Relapse Acute Leukemia After Allo-HSCT                                                                                                                                                      | Genetically modified DCs plus CIK cells, Donor leukocyte infusions (DLI)                                                          | Acute Leukemia                            | Unknown † | 1, 2 |  |
